# NOVEL ORGAN-SPECIFIC GENETIC FACTORS FOR QUANTITATIVE RESISTANCE TO LATE BLIGHT IN POTATO

Deissy Katherine Juyo Rojas<sup>1</sup> [orcid.org/0000-0001-6220-2554](https://orcid.org/0000-0001-6220-2554), Johana Carolina Soto Sedano<sup>2</sup>  
[orcid.org/0000-0001-7890-4403](https://orcid.org/0000-0001-7890-4403), Agim Ballvora<sup>3</sup> [orcid.org/0000-0003-0949-8311](https://orcid.org/0000-0003-0949-8311), Jens Léon<sup>3</sup>  
[orcid.org/0000-0002-6514-3112](https://orcid.org/0000-0002-6514-3112), Teresa Mosquera Vásquez<sup>1</sup> [orcid.org/0000-0003-4854-1079](https://orcid.org/0000-0003-4854-1079) \*

1. Universidad Nacional de Colombia, sede Bogotá, Facultad de Ciencias Agrarias, Carrera 30 No. 45 - 03, Building 500 Bogotá, Colombia.
2. Universidad Nacional de Colombia, sede Bogotá, Facultad de Ciencias, Carrera 30 No. 45 - 03, Building 421 Bogotá, Colombia.
3. University of Bonn, Institute of Crop Science and Resource Conservation (INRES) Katzenburgweg 5, D-53115 Bonn, Germany.

## \* Correspondence:

Corresponding Author

[tmosquerav@unal.edu.co](mailto:tmosquerav@unal.edu.co) telephone number 571- 3165000 ext. 19101

**Keywords:** leaves resistance, stem resistance, Group Phureja, *Phytophthora infestans*, candidate resistance gene.

## Abstract

Potato, *Solanum tuberosum*, is one of the highest consumed food in the world, being the basis of the diet of millions of people. The main limiting and destructive disease of potato is late blight, caused by *Phytophthora infestans*. Here, we present a multi-environmental analysis of the response to *P. infestans*

using an association panel of 150 accessions of *S. tuberosum* Group Phureja, evaluated in two localities in Colombia. Disease resistance data were merged with a genotyping matrix of 83,862 SNPs obtained by 2b-restriction site-associated DNA and Genotyping by sequencing approaches into a Genome-wide association study. We are reporting 16 organ-specific QTL conferring resistance to late blight. These QTL explain from 13.7% to 50.9% of the phenotypic variance. Six and ten QTL were detected for resistance response in leaves and stem, respectively. *In silico* analysis revealed 15 candidate genes for resistance to late blight. Four of them have no functional genome annotation, while eleven candidate genes code for diverse proteins, including one leucine-rich repeat kinase.

## 1. Introduction

Potato (*Solanum tuberosum*) is the most important non-cereal crop and plays a basic role for the food security and nutrition [1]. Also, potatoes are an important crop for farmers and consumers because of its ability to efficiently transform inputs into a high-quality food with an excellence consumer acceptance.

The predominately cultivated potato species worldwide is *S. tuberosum* L. ( $2n=4x=48$ ), this species contains two groups: Chilotanum (tetraploid potato) and Andigenum [2]. The Group Andigenum has a subset of diploid potatoes ( $2n=2x=24$ ), the Group Phureja [3]. Phureja has been used worldwide as a genetic source and has contributed to understand the genetic basis of several agronomic traits of potato. It is worth to notice that the current potato reference genome sequence is obtained from DM1-3516 R44 a Phureja genotype [4].

Potato, as any other vegetative multiplied crop, is affected by several pests and diseases and the most devastating disease affecting this crop is late blight caused by the oomycete *Phytophthora infestans* [5–8]. Late blight has been reported in the main regions where potato is grown, including more than 130 countries distributed over Asia, Africa, Oceania, Europe, South, Central and North America [9].

44 Thereby, great concern exists worldwide for possible emergence of new *P. infestans* strains as well as  
 45 for the number of countries affected by the disease that could be increasing. Although chemical control  
 46 of late blight is possible, the best alternative is through the use of resistant varieties. In potato, both,  
 47 pathotype-specific (vertical resistance) and race non-specific resistance (field, horizontal, polygenic or  
 48 partial resistance) have been reported [6,7,10–12].

49 The potato breeding programs worldwide are focused to obtain late blight resistant cultivars through  
 50 conventional breeding [13–15]. Despite these programs have successfully developed partial resistant  
 51 cultivars [16], several challenges remain to be faced. If the selection is based on vertical resistance  
 52 exists the risk of its breakdown caused by an eventual emergence of new *P. infestans* races [11], but if  
 53 the selection is based on horizontal resistance, this is highly dependent on the environmental  
 54 conditions, as well as on the pathogen strains. Thus, the cultivar resistance could change depending on  
 55 the geographic region [17]. To face these challenges, it is important the detection of quantitative trait  
 56 loci (QTL) that govern late blight resistance in both tetraploid and diploid potatoes, through methods  
 57 based on genetic variants capture by DNA molecular markers such as Genome-wide association studies  
 58 (GWAS) and on multi-environmental phenotyping. This will reduce the time required in the process,  
 59 and also will contribute to a better understanding of the genetic basis of potato - *P. infestans* interaction.

60 In potato, several successful association mapping studies have been achieved for traits such as diseases  
 61 resistance [12,18–20]. For diploid potatoes, the search for sources of resistance to late blight through  
 62 GWAS has been relatively scarce. Two candidate genes and three SNPs associated with quantitative  
 63 resistance to late blight in the Group Phureja were identified using 371 SNP distributed along the  
 64 genome [18,21].

65 In the polygenic resistance one of the major limitations is the characterization of the plant-pathogen  
 66 interaction due to many influencing factors, including the biology, genetics and evolution of the

pathogen in addition to the environmental conditions [22]. To facilitate the understanding of polygenic resistance, it has been proposed to subdivide the behavior of the disease in the different affected organs of the plant [23].

Studies indicate that differences in organ-specific resistances are resulting in an increase of transcription levels, although there is also the possibility that organs develop hypersensitivity response (HR) [23–25].

The aim of the presented study is to identify QTL for resistance to late blight in landrace accessions *S. tuberosum* Group Phureja. We employed a GWAS using phenotypic data from the characterization of disease resistance conducted in two localities and genotyping data obtained from GBS and 2b-RAD approaches. Here, we report 16 organ-specific QTL for resistance to late blight in *S. tuberosum* Group Phureja. The analysis of DNA sequence corresponding to the QTL reveals 15 candidate defense genes that both, contribute to a better understanding of the genetic control of late blight resistance in diploid potato, and also could be used in the future in potato breeding programs.

## 2. Materials and Methods

### 2.1. Plant material

The association panel consists of 150 accessions of *S. tuberosum* Group Phureja from the Working Collection of the Potato Breeding Program at Universidad Nacional de Colombia. From them, 109 are landrace accessions belonging to the Colombian Core Collection (CCC). Five are Colombian commercial genotypes, denoted as commercial cultivars, Criolla Colombia (CrCol), Criolla Guaneña (CrGN), Criolla Latina (CrLSE1), Criolla Paisa (CrPSE1), and Criolla Galeras (CrGL). Four are diploid accessions from the *IPK Germplasm Bank of Germany* (Leibniz-Institut für Pflanzengenetik

und Kulturpflanzenforschung), which correspond to materials collected in Colombia, Peru and Bolivia by the International Potato Center (CIP). Three accessions are from a segregating F1 population derived from a cross between the susceptible parental 48A.3 and the resistant parental 2A4, that exhibit different levels of resistance to *P. infestans*, and 20 are a new set of landrace accessions (CA) that were collected in Nariño province, located at south of Colombia, in 2013. The cultivars ICA Unica and Diacol Capiro were the resistant and the susceptible controls to late blight, respectively.

Each accession was multiplied vegetatively, late blight-free, using seed potato tubers at the experimental station, Centro Agropecuario Marengo of Universidad Nacional de Colombia, with an altitude of 2,516 meters above sea level (masl), annual average temperature of 13.7 °C, and cumulated rainfall of 669.9 mm/year. The production of seeds was carried out during three consecutive crop cycles under the Colombia traditional conditions of potato crop [26].

## 2.2. Genotyping approaches

GBS libraries were prepared and analyzed at the Génome Québec Innovation Centre from McGill University, while the 2b-RAD was conducted at the Agriculture and Agri-Food Canada (AAFC). The *PstI/MspI* enzymes were used for GBS digestion and the selective amplification was performed according to [27]. The *AlfI* enzyme was used for 2b-RAD approach. The DNA fragments generated were sequenced using the MiSeq system from Illumina®.

DNA sequencing raw data from GBS and 2b-RAD were analyzed for SNP polymorphisms detection, according to the NGSTools Eclipse Plugin (NGSEP) [28]. The SNP calling was performed by

alignments to the current potato reference genome from *S. tuberosum* Group Phureja clone DM1-3 (v4.03) [29], in order to obtain an annotated SNP matrix.

The filters applied to the annotated SNP matrix allowed to select those SNPs with quality score higher than 40 (-q 40), 0.05 Minor Allele Frequency (MAF), minimum distance of 5 bp between variants, and SNPs located in non-repetitive regions according to the RepeatMasker annotated repeats [29]. Then, the SNP matrix was filtered using SAS® software (SAS institute Inc.). The criteria such as a MAF higher than 0.05 and less than 10% of distorted molecular markers were allowed and those SNPs with Mendelian segregation of 1:1 were selected.

### 2.3. Evaluation of potato response to late blight disease

The evaluation of the response of the association panel to late blight was carried out in two localities during different crop cycles, starting in May 2010 until July 2014. The combination of localities and the crop cycles conformed seven environments, with specific conditions, that were coded ENV1 to ENV7 (Table 1). The localities were, La Unión in Antioquia, (5°58'22"N 75°21'40"O) and Subachoque, in Cundinamarca (4° 55' 41" N, 74° 10' 25" W). These localities were selected as important potato production regions in Colombia, and have a high natural inoculum pressure of *P. infestans*. The experimental design used for the phenotypic evaluation consisted of an incomplete block design with three biological replicates (plant clones) per genotype, distributed in blocks of 12 experimental units of three tubers. The controls for resistance and susceptibility were the cultivars Ica

Unica and Diacol Capiro, respectively [30]. The plants were evaluated for their response to *P. infestans* under natural infection conditions and inoculum pressure of RG57 (EC-1 clonal lineage), mating type A1, which is the predominant pathogen presented in both localities [31].

**Table 1. Description of each environment for the phenotyping evaluation for resistance to *Phytophthora infestans* in Group Phureja.** It is shown the name of location, the crop season, mean temperatures, mean relative humidity (RH), mean precipitation and code.

| Location                  | Crop season                   | Temp. (C°) <sup>a</sup> | RH (%) <sup>a</sup> | Mean precipitation (mm/crop season) <sup>a</sup> | Code  |
|---------------------------|-------------------------------|-------------------------|---------------------|--------------------------------------------------|-------|
| La Unión (Antioquia)      | May 2010 – August 2010        | 15.1                    | 86.6                | 16.5                                             | ENV1* |
| La Unión (Antioquia)      | November 2010 – February 2011 | 14.2                    | 88.6                | 8.5                                              | ENV2* |
| La Unión (Antioquia)      | February 2013 - May 2013      | 14.8                    | 89.1                | 9.4                                              | ENV3  |
| La Unión (Antioquia)      | March 2014 - July 2014        | 13.6                    | 93.4                | 4.4                                              | ENV4  |
| Subachoque (Cundinamarca) | May 2010 – August 2010        | 14.4                    | 86.3                | 4.4                                              | ENV5* |
| Subachoque (Cundinamarca) | December 2010- April 2011     | 13.3                    | 85.7                | 2.6                                              | ENV6* |
| Subachoque (Cundinamarca) | November 2013 - February 2014 | 13.1                    | 80.0                | 2.6                                              | ENV7  |

<sup>a</sup> Average of environmental parameters (IDEAM [www.ideam.gov.co](http://www.ideam.gov.co)).

\* Data from [18]

The severity of late blight was estimated and scored according to the Percentage of Direct Visual Estimation of the disease (PDVE) [32] in leaves and stems following the concepts presented by Bock et al., [34] and the procedure described by Álvarez et al., [18]. The evaluations were conducted by expert raters in late blight, who made the estimations along the experiments. The diseased leaves and stems were assessed independently per each plant and for each organ. The severity was estimated as the percentage of the affected area for leaves and stems through a visual direct estimation. For stems, the PDVE was averaged over the number of stems of each genotype. The evaluation started 40 days post sowing (dps) and were performed weekly until the susceptible control was completely affected (PDVE = 100%). Disease progress in time for each plant was analyzed by estimating the Area Under Disease Progress Curve (AUDPC) and the Relative Area Under Disease Progress Curve (rAUDPC) to the total area [33,35]. The rAUDPC value for each genotype per environment was calculated by using the PROCMEAN procedure of SAS®.

In order to evaluate the resistance response of the Phureja genotypes to late blight infection, previous data of the resistance in leaves in the population were taken into account. These data correspond to the phenotypic evaluation of late blight response of 104 diploid accessions of the Group Phureja (CCC), in the same two localities from May 2010 to February 2011 (ENV1, ENV2, ENV5, and ENV6) [18] (Table 1) and these evaluations were integrated for the analysis with new evaluations for the same plant material conducted from February 2013 until July 2014 (ENV3, ENV4, and ENV7).

## **2.4. Analysis of genetic stability**

The GGE-biplot criteria were centered by two (centered G + GE), without scaling and singular value partitioning (SVP). GGE-biplot analysis was performed using the R package GEA-R [36].



166

167

## 168      **2.5.      Statistical analysis**

169

170    The rAUDPC values were tested for variance components of genotype, genotype by environment, and  
 171    experimental error through an ANOVA (SI 1). All analyses were performed using the SAS® software.  
 172    AUDPC data for the trials of late blight resistance evaluation of the CCC population were included for  
 173    best linear unbiased predictors (BLUPs) estimation and association analysis. These data correspond to  
 174    the phenotypic evaluation of late blight disease response of 104 diploid accessions of the Group Phureja  
 175    CCC, at La Unión from May to August 2010, from May to August 2010 at Subachoque, from  
 176    November 2010 to February 2011 at La Unión, and from December 2010 to April 2011 at Subachoque  
 177    [18] (Table 1).

178

## 179      **2.6.      Genome-wide association study for late blight resistance**

180

181    GWAS was performed for marker main and marker by locality interaction effects simultaneously using  
 182    a liner mixed model in PROC MIXED procedure in SAS® program (SAS version 9.2) following the  
 183    model:

$$184 \qquad Y_{ijk} = \mu + M_i + T_j + M_i * T_j + e_{ijk}$$

185    Where  $Y_{ijk}$  is the phenotypic value;  $\mu$  is the general mean;  $M_i$  is the random effect of i-th marker  
 186    genotype;  $T_j$  is the locality effect fixed of j-th locality;  $M_i * T_j$  is the interaction random effect of i-th

marker with  $j$ -th local; and  $e_{ijk}$  is the residual. To determine traits of interest in the genome wide detection analysis, a log-of-odds (LOD) threshold with  $P$ -value  $\leq 0.00001$ , and 1000 permutations was determined. The QTL model comprises an iterative multiloci procedure. Therefore, the most informative SNP (QTL) was set as a fixed factor during each calculation iteration step. All remaining markers were again incorporated in the next iteration round and re-analyzed. The starting point of each calculation round was determined by the result of the previous iteration.  $P$ -values of significant markers were corrected using Probability of False Discovery Rate (PFDR) of lower than 0.05, implemented in the SAS procedure PROC MULTTEST according to Benjamini and Yekutieli [37]. This procedure was repeated until no marker could be detected, which led to a reduction in significant markers and thereby a reduced number of false-positive QTL. A confidence interval of 1000 bp was chosen on both sides of the most significant SNP and designated as putative QTL. SNPs were combined to one joint QTL depending on their estimated (significant)  $P$ -value from the first iteration of the multi loci procedure. Therefore, the size of the genetic interval was dependent on the significance value of flanking SNPs.

The phylogenetic relationships of the 150 potato genotypes were determined based on the allele frequency of each SNP, the genotypes were assigned to an eventual population, using a Bayesian modeling in the software STRUCTURE v.2.3 [38]. The population structure matrix was used as the matrix  $Q$  in the association model.

## 2.7. QTL mapping and candidate gene proposed

The DNA sequences harboring SNPs identified as statistically associated with the phenotypic data of the response to late blight were explored through BLAST (Basic Local Alignment Search Tool)

analysis to the current potato reference genome (v4.04). These sequences were searched also in the potato consensus QTL map [39] in order to find co-localizations of SNPs with previous reported QTL.

### 3. Results

#### 3.1. GBS and 2b-RAD genotyping in *Solanum tuberosum* Group Phureja

Plant genome-wide genotyping for single nucleotide polymorphism (SNP) detection was performed by GBS [40] and 2b-RAD [41] approaches, using Illumina Hi-seq (Illumina, Inc.), which produced both in total 349,965,885 reads. Using GBS were obtained 302,965,885 reads of 90 bp, while with 2b-RAD 46,502,388 reads of 36 bp. On average, 88% of the reads, were aligned to unique positions in the potato reference genome (v4.04) [29]. Based NGSEP analyses a total of 87,656 SNPs were identified. From them, 85,755 SNPs were obtained from GBS and 1,901 from 2b-RAD. Finally, the subsequent filtering criteria reduced the matrix to 83,862 SNPs. These SNPs are distributed across of the 12 potato chromosomes with an average of 6,988 for each chromosome. The higher densities of SNPs were found in chromosomes I, III, and IV with 10,427; 8,237 and 8,160 SNPs, respectively (Figure 1). From the resulting matrix of 83,862 SNPs, 60% (49,948) corresponds to transitions while 40% (33,914) are transversions, with a ratio of 1.47 (SI 2).

**Figure 1. Number of SNPs mapped for each chromosome in the potato genome.** Numbers on the right of bars show the total SNPs identified through GBS and 2b-RAD located in each chromosome as indicated by roman letters on y-axis.

### 3.2. Evaluation of late blight response in an association panel of Group Phureja

Both AUDPC and rAUDPC values for the genotypes for each locality and season showed a continuous distribution. The AUDPC values observed among the genotypes were the highest in the ENV6 (ranged from 1,400 to 13,325), followed by ENV5 (from 503.5 to 11,964.2) and then, by ENV2 (from 1,416.6 to 10,227.7). In the Table 2, it is shown the number of evaluated genotypes, the AUDPC and rAUDPC ranges.

**Table 2. Distribution of the AUDPC and rAUDPC values in the Group Phureja association panel.** Number of genotypes evaluated, range of AUDPC and rAUDPC values.

| Location/code | Evaluated genotypes | AUDPC range      | rAUDPC range |
|---------------|---------------------|------------------|--------------|
| ENV1          | 112                 | 437.5 – 12,835   | 0 – 3.67     |
| ENV2          | 112                 | 1416.6 – 10227.7 | 0.28 – 2.08  |
| ENV3          | 111                 | 0 – 1456.6       | 0 – 0.46     |
| ENV4          | 114                 | 0 – 834.1        | 0 – 0.23     |
| ENV5          | 112                 | 503.5 – 11964.2  | 0.07 – 1.89  |
| ENV6          | 112                 | 1,400 – 13,325   | 0.25 – 2.37  |
| ENV7          | 137                 | 4.16 – 1713.4    | 0 – 0.40     |

### 3.3. Stability analysis

With the purpose of evaluate the performance of Phureja genotypes under different environments; a genotype x environment analysis was conducted through a GGE-biplot analysis of Multi-Environment Trials (MET). The rAUDPC values of each genotype in each plant organ (leaves and stems) were analyzed independently. The GGE-Biplot analysis shows that the two principal components explained 77.5% and 91.1% of the total variance caused by  $G_{\text{plant}} + G_{\text{pathogen}} + E$  for Phureja resistance to late blight in leaves and stem, respectively (Table 3 and Figure 2). The leaves analysis showed the two mega-environments conformation, MET 1 (ENV1, ENV2, ENV5, and ENV6) and MET 2 (ENV3, ENV4 and ENV7). But for stem analysis no mega-environments were detected. The rAUDPC values of the genotypes were able to discriminate among seven environments tested. The behavior of genotypes for both leaves and stem fall into two sectors of the graphic. For leaves resistance, the genotypes behavior seems to be quite similar in MET 1, where, the genotypes exhibit more susceptibility in the environment ENV1. In MET 2, the environments ENV3 and ENV4 show also the most susceptible genotypes (Figure 2).

**Figure 2. Which Won Where/What graphic of GGE-Biplot analysis for leaves and stem resistance evaluation.** (a) GGE-Biplot analysis for phenotype evaluation against *P. infestans* in leaves. (b) GGE-Biplot analysis for phenotype evaluation against *P. infestans* in stem. ENV codes are shown in table 1.

**Table 3. Summary of genome associations for resistance to late blight by location.** Plant organ, localization, genome position, QTL for late blight resistance, its significance and gene annotation were the QTL resides.

| Plant organ | Location                  | Genome position     | QTL name  | P-value     | R <sup>2</sup> | Gen annotation (Arabidopsis and Tomato)                    |
|-------------|---------------------------|---------------------|-----------|-------------|----------------|------------------------------------------------------------|
| Leaves      | Subachoque (Cundinamarca) | Chr 1 Pos 37547438  | RPiLSub1  | 6,2616E-08  | 18.8%          | Protein Glycoside hydrolase, catalytic domain              |
|             |                           | Chr 3 Pos 54281967  | RPiLSub3  | 9,0818E-09  | 25.1%          | Chloroplast protein with Zinc finger domain                |
|             |                           | Chr 6 Pos 40366150  | RPiLSub6  | 2,5174E-06  | 16.3%          | Integral membrane transporter family protein               |
|             | La Unión (Antioquia)      | Chr 3 Pos 3162604   | RPiLLU3a  | 9,15844E-11 | 28.5%          | Ubiquitin receptor protein associated with PEX2 and PEX12. |
|             |                           | Chr 3 Pos 54281967  | RPiLLU3b  | 4,49269E-09 | 24.3%          | Chloroplast protein with Zinc finger domain                |
|             |                           | Chr 11 Pos 7171775  | RPiLLU11  | 8,99280E-06 | 13.7%          | Receptor-like protein kinase                               |
| Stem        | Subachoque (Cundinamarca) | Chr4 Pos 9090691    | RPiSSub4  | 2,04E-06    | 17.3%          | Leucine-rich repeat protein kinase family protein          |
|             |                           | Chr 6 Pos 11035921  | RPiSSub6  | 1,14E-09    | 25.8%          | SIT4 phosphatase-associated family protein                 |
|             |                           | Chr 7 Pos 53724116  | RPiSSub7  | 1,07E-09    | 25.8%          | Actin filament-based movement. Endocytosis                 |
|             |                           | Chr 10 Pos 51118650 | RPiSSub10 | 1,02E-07    | 20.8%          | DHHC-type zinc finger family protein                       |
|             |                           | Chr 12 Pos 57373550 | RPiSSub12 | 1,27E-08    | 23.2%          | No functional annotation                                   |
|             | La Unión (Antioquia)      | Chr 5 Pos 45069210  | RPiSLU5   | 3,00E-08    | 22.2%          | Ser/Thr protein kinase, BLUS1                              |
|             |                           | Chr 10 Pos 4646061  | RPiSLU10  | 3,53E-11    | 27.7%          | No functional annotation                                   |

|  |  |                     |           |          |       |                                                  |
|--|--|---------------------|-----------|----------|-------|--------------------------------------------------|
|  |  | Chr 12 Pos 3076623  | RPiSLU12a | 1,60E-14 | 33.3% | Serine/threonine-protein kinase. Plasma membrane |
|  |  | Chr 12 Pos 38707075 | RPiSLU12b | 7,64E-23 | 50.9% | No functional annotation                         |
|  |  | Chr 12 Pos 56839213 | RPiSLU12c | 6,32E-18 | 38.4% | No functional annotation                         |

268

269

270 On the other hand, the genotypes CCC003 (32) and CCC101 (103) were identified as extreme resistant  
271 and susceptible to late blight, respectively evaluated in leaves, while the genotypes CCC086 (91) and  
272 CC133 (131) were identified in stem as extreme resistant and susceptible, respectively. The numbers  
273 in the parentheses are the running ones as shown in the Figure 2. According to the rAUDPC, 44  
274 genotypes are resistant in the stem evaluation. For leaves, five genotypes CCC003 (32), CCC051 (68),  
275 CCC005 (34), CCC115 (114), and the control Unica (233) were the most resistant.

276

### 277 3.4. Stable QTL identified for late blight resistance in leaves and stem

278

279 In total 16 organ-specific QTL distributed in nine of the 12 chromosomes were identified (Table 3 and  
280 Figure 3). The QTL detected explain from 13.7% to 50.9% of the phenotypic variance (late blight  
281 resistance) (Table 3). Six QTL were detected through the leaves evaluation, three under locality  
282 Subachoque and the other three for the locality La Unión. Two of these QTL were considered as stable  
283 as they were detected in the same organ (leaves) in the two localities, RPiLSub3 and RPiLLU3b for  
284 Subachoque and La Union, respectively. The QTL RPiLSub3 explains 25.1% while the QTL  
285 RPiLLU3b explains the 24.3% of the resistance to *P. infestans* (Table 3). On the other hand, ten QTL

were detected for late blight stem resistance. Five QTL were detected in Subachoque locality and the other five in La Unión. The QTL coded as RPiSLU12b explains the highest phenotypic variance of 50.9% identified through the stem evaluation.

**Figure 3. SNPs mapped in the potato chromosomes of Group Phureja.** Genomic distances are given in Mbp according to the PGSC V4.03 pseudomolecules [29]. In red are presented the QTL for late blight resistance detected in the phenotypic response for leaves, while in blue are presented those detected for stems. In black are presented the markers that limit each chromosome in the potato genome. Diagram plotted using MapChart software [41].

### 3.5. QTL and candidate genes for organ-specific resistance to late blight

The DNA genome sequences harboring associated SNPs to late blight resistance were analyzed *in silico* using BLAST against the current potato reference genome (v4.04) and to the potato consensus QTL map [29]. Those genes which co-localized with the SNPs associated to late blight resistance were considered as candidate genes for late blight resistance. In total, 15 candidate genes were identified, ten for stem resistance and five for leaves resistance. Among the total of candidate genes, those corresponding to the QTL RPiSSub12, RPiSLU10, RPiSLU12b, and RPiSLU12c have not been previously annotated, while the other 11 candidate genes, have known functional annotation in the current potato genome, with diverse protein domains (Table 3). Interestingly, the QTL RPiSSub4, which explains 17.3% of the resistance to late blight in stem, co-localized with a gene coding for a leucine-rich repeat containing protein kinase, a class of genes shown to be involved in plant immunity.



#### 4. Discussion

We identified 16 organ-specific QTL for resistance to *P. infestans* and 15 candidate genes that might have a putative function in the defense response of potato against this pathogen. For that an association panel of 150 accessions from *S. tuberosum* Group Phureja was evaluated under seven environments conditions and genotyped through GBS and 2b-RAD. The locations chosen for the phenotypic evaluation to late blight organ-specific disease response (La Unión-Antioquia and Subachoque-Cundinamarca) are important potato production regions in Colombia with high natural pathogen pressure. Moreover, these are geographic regions where the late blight disease response in the Group Phureja has been evaluated before and the *P. infestans* populations in these regions have been explored [43]. Nevertheless, it will be interesting to explore the actual genetic diversity of the *P. infestans* populations in these two locations, in order to elucidate connections between this variability and the variability found both in the defense response of the evaluated genotypes and also in the identified QTL. Furthermore, this will let directing the potato breeding programs toward the development of resistant adapted materials for these important potato production regions.

In the genetic stability analysis, the addition of the phenotypic data (ENV1, ENV2, ENV5, and ENV6) shows a major variation of the resistance behavior in the genotypes and revealed the presence of Meta Environments. In the phenotypic evaluation of stems, the genotypes behavior was less dissimilar with a clear resistance trend. On the other hand, in the leaves phenotypic evaluation, the MET 1 (Figure 3) grouped the phenotypic data, which were obtained when the climate phenomenon called La Niña affected Colombia, and in consequence those crop cycles presented higher relative humidity than MET 2. While in the MET 2 those environments considered as normal years with an average relative

humidity were grouped. Therefore, as previously reported, the environments with higher relative humidity seem to be the most favorable for the late blight disease development [5,44].

In this study 16 organ-specific QTL conferring resistance in potato Group Phureja against *P. infestans* were identified, explaining high levels of phenotypic variance or late blight resistance (13.7% to 50.9%) thus these regions could be considered as QTL with major effects [45]. Ten of these QTL were detected through the stem evaluation while the other six QTL were detected through the leaves evaluation. Despite that it is known that the response in a plant to a pathogen can be organ specific [24], according to our understanding this is the first organ-specific late blight resistance QTL detection study through the phenotyping in leaves and stem from *S. tuberosum* Group Phureja.

The organ specific analyses have been considered as a useful way to dissect and understand the plant pathogen polygenic resistance. Detection of organ-specific pathogen resistance QTL has already been published in several crops such as maize (*Zea mays*) [46], tetraploid potato [23–25] and wheat [47]. The resistance responses in different plant organs have been associated with the ability and speed of defense related metabolites production, as well as how these metabolites can be transported to other plant organs and then increase the plant pathogen basal defense. Dannan et al., [23] report that one of the advantages of the high level of resistance to late blight exhibited by the potato stem compared to the leaves, is the ability of the stem to recover the plant leaves and thus could have a significant potential in controlling late blight epidemics in the field.

Several resistance QTL to late blight have been reported in *S. tuberosum* Group Phureja [4,48,49], however, none of those QTL were identified in this study. This could be explained by the high effect of the environments where the phenotypic evaluations were performed. Also, the plant materials employed, their genetic backgrounds, and the phenotyping restricted to specific plant organ could have an important influence in the QTL detection. Nevertheless, we are reporting a stable QTL, which

receives its name according to the locality in which it was detected, RPiLSub3 and RPiLLU3b, in Subachoque and La Unión conditions respectively. In Subachoque this QTL explains 25.1% while in La Unión explains the 24.3% of the resistance to *P. infestans*. The phenotypic variance explained by a QTL could change depending on the environment where the phenotypic data were collected and also by the evaluated organ. This variability has been reported in QTL for maize [50], barley [51], and *Brassica rapa* [52].

The genome regions harboring the SNPs associated with resistance to late blight harbor genes coding for proteins carrying diverse domains and were established as candidate genes for resistance to late blight. We propose 15 candidate genes, four of them have not functional annotation so far. Interestingly, two of these anonymous QTL, are those explaining the highest percentage of phenotypic variances, RPiSLU12c and RPiSLU12b, which explain 38.4% and 50.9% of the resistance to late blight, respectively. These genomic regions have a big potential to be explored in the near future for functional validation and establish their annotation.

Both qualitative and quantitative resistance have been described in the *S. tuberosum* - *P. infestans* interaction [6,18,46,53]. Thus, it is not surprising that within the set of candidate genes was found a gene coding for a leucine-rich repeat protein kinase family, a protein typically related to qualitative resistance, co-localizing with the RPiSSub4 QTL. This finding reinforces the thesis that the qualitative resistance governed by the Avr-R interactions and the quantitative resistance governed by QTL can act simultaneously. On the other hand, the fact that the majority of the identified candidate genes do not belong to classical protein domains of resistance genes, goes accordingly to previous findings where it has been shown that the proteins carrying the classical resistance domains could be just a few of the whole set of proteins that governs the quantitative resistance [22].

Here four candidate genes coding for protein kinases were identified co-localizing with the QTL RPiLLU11, RPiSSub4, RPiSLU5, and RPiSLU12a. The role of kinases has broadly described in plant resistance [54–55]. Their roles have been described as a receptor molecule and also involved in the defense signaling pathway [58]. In *S. tuberosum* some protein kinases have been reported such as calcium-dependent protein kinases (CDPKs) decode calcium ( $\text{Ca}^{2+}$ ) signals and activate different signaling pathways involved in hormone signaling and both abiotic and biotic stress responses [59]. In this study, the authors identified different organ-specific expression levels among the genes *CDPKs*. The higher expression of these genes was in roots, stolons, and microtubers compared with the level in leaves and stems (i.e. StCDPK7). Also, the potato CDPKs can be sorted into two classes, those which are ubiquitously expressed in different tissues and those that have specific expression pattern which are approximately one-third of the CDPK family [59].

The results presented here demonstrate the great potential of the Group Phureja as an alternative source of resistance to potato late blight. In fact, the diploid nature of this group facilitates its use in molecular breeding programs, whose aim is the transferring of resistance into tetraploid potatoes gene pool. This article shows that the responses of potato plants to *P. infestans* infection are organ-specific. These differential responses can have an important impact on the behavior of the genotype and therefore on its production. Therefore, these results open the door to continue exploring this type of resistance, so in the near future we can develop strategies that integrate the specific responses in the potato improvement and production programs.

It is known that the dynamics with which effectors and *R* genes interact in resistant potato genotypes versus susceptible genotypes differ in the level of transcription, as well as in the speed with which it is induced in tuber [25] and in leaves [60]. Now, our results open the way for studies of expression demonstrating the above in potato leaves of the Group Phureja and for the first time in potato stem.

The identified QTL in this research are an advance in the discovery of new organ-specific genetic factors involved in the resistance response of *S. tuberosum* Group Phureja to *P. infestans* infection. Also, the genomic regions associated and the candidate genes proposed are resistance sources to be functionally validated in the near future. The environment specific QTL here described hides interesting molecular mechanisms to be explored to a better understanding the genotype-environment interactions in the potato - *P. infestans* interaction. Finally, the results could be integrated into potato genetic breeding programs focused on marker assisted selection, as well as, for the development of local adapted new cultivars or by combining or pyramiding these QTL to develop environment independent resistant cultivars.

## 5. Conflict of Interest Statement

The authors declare that the research was conducted in the absence of any commercial or financial relationships that could be construed as a potential conflict of interest. The authors declare no conflict of interest.

## 6. Author's contributions

DJ: Designed and established the experiments, took the data, analyzed the results, prepared the draft of manuscript. JS: Revised and analyzed the results, prepared the draft of manuscript. AB: Contributed with conceptualization of the original idea, revised the results, analyzed the results, revised the draft of manuscript. JL: Revised and analyzed the results, revised the draft of manuscript. TM: Conceptualized the original idea, supervised the whole research, designed the experiments, revised the results and analyses and revised the manuscript.

421

## 422        **7. Funding**

423        This research was funded by the International Development Research Centre (IDRC) and Global affairs  
424        Canada through the Canadian International Food Security Research Fund (CIFSRF) that funded the  
425        project SAN Nariño number 108125-002, and the “Departamento Administrativo de Ciencia,  
426        Tecnología e Innovación” COLCIENCIAS for funding the Project 110171250437 and the PhD  
427        scholarship call 727-2015.

428

429

## 430        **8. Acknowledgments**

431        We are grateful to Dr. Klaus Dehmer for supporting this work with plant material consisting in diploid  
432        accessions from the *IPK Germplasm Bank of Germany* (Leibniz-Institut für Pflanzengenetik und  
433        Kulturpflanzenforschung. We would like to thank to Jorge Duitama from “Universidad de los Andes”  
434        for the bioinformatics support; to Diana Duarte, Bobby Mathew, and Said Dadshani from INRES  
435        Institute of University of Bonn for their scientific support and to María Cecilia Delgado for her  
436        collaboration in the establishment of the experiments in field conditions.

437

## 438        **9. Supporting information captions**

439        **SI 1.** a. Analysis of variance for genotype, environment and genotype x environment among the  
440        association panel for a. leaves phenotyping. b. stem phenotyping ( $p < 0.001$ ).

**SI 2.** Transitions and transversion SNPs from the genotyping matrix of 83,862 SNPs.

**SI 3.** rAUDPC values by genotype for leaves and stem resistance evaluations.

**SI 4.** GBS and 2b-RAD genotyping data.

**Conflict of Interest Statement:** The authors declare that the research was conducted in the absence of any commercial or financial relationships that could be construed as a potential conflict of interest.

## 10. Data Availability Statement

The genotyping data supporting the conclusions of this manuscript is available in SI 4.

## 11. References

1. FAOSTAT. FAOSTAT. In: FAOSTAT [Internet]. 2018 [cited 19 Oct 2018]. Available: <http://www.fao.org/faostat/en/#home>
2. Spooner DM, Núñez J, Trujillo G, Herrera M del R, Guzmán F, Ghislain M. Extensive simple sequence repeat genotyping of potato landraces supports a major reevaluation of their gene pool structure and classification. PNAS. 2007;104: 19398–19403. doi:10.1073/pnas.0709796104
3. Ghislain M, Andrade D, Rodríguez F, Hijmans RJ, Spooner DM. Genetic analysis of the cultivated potato *Solanum tuberosum* L. Phureja Group using RAPDs and nuclear SSRs. Theor Appl Genet. 2006;113: 1515–1527. doi:10.1007/s00122-006-0399-7
4. The Potato Genome Sequencing Consortium. Genome sequence and analysis of the tuber crop potato. Nature. 2011;475: 189–195. doi:10.1038/nature10158
5. Nowicki M, Foolad MR, Nowakowska M, Kozik EU. Potato and Tomato Late Blight Caused by *Phytophthora infestans*: An Overview of Pathology and Resistance Breeding. Plant Disease. 2011;96: 4–17. doi:10.1094/PDIS-05-11-0458

- 465 6. Mosquera T, Alvarez MF, Jiménez-Gómez JM, Muktar MS, Paulo MJ, Steinemann S, et al.  
466 Targeted and Untargeted Approaches Unravel Novel Candidate Genes and Diagnostic SNPs for  
467 Quantitative Resistance of the Potato (*Solanum tuberosum* L.) to *Phytophthora infestans*  
468 Causing the Late Blight Disease. Yin T, editor. PLOS ONE. 2016;11: e0156254.  
469 doi:10.1371/journal.pone.0156254
- 470 7. Ballvora A, Ercolano MR, Weiss J, Meksem K, Bormann CA, Oberhagemann P, et al. The R1  
471 gene for potato resistance to late blight (*Phytophthora infestans*) belongs to the leucine  
472 zipper/NBS/LRR class of plant resistance genes. *Plant J.* 2002;30: 361–371.
- 473 8. Leonards-Schippers C, Gieffers W, Schäfer-Pregl R, Ritter E, Knapp SJ, Salamini F, et al.  
474 Quantitative resistance to *Phytophthora infestans* in potato: a case study for QTL mapping in an  
475 allogamous plant species. *Genetics.* 1994;137: 67–77.
- 476 9. Centre for Agriculture and Biosciences International. CABI.org [Internet]. 2018 [cited 19 Oct  
477 2018]. Available: <https://www.cabi.org/>
- 478 10. Ballvora A, Jöcker A, Viehöver P, Ishihara H, Paal J, Meksem K, et al. Comparative sequence  
479 analysis of *Solanum* and *Arabidopsis* in a hot spot for pathogen resistance on potato  
480 chromosome V reveals a patchwork of conserved and rapidly evolving genome segments. *BMC*  
481 *Genomics.* 2007;8: 112. doi:10.1186/1471-2164-8-112
- 482 11. Fry WE, Birch PRJ, Judelson HS, Grünwald NJ, Danies G, Everts KL, et al. Five Reasons to  
483 Consider *Phytophthora infestans* a Reemerging Pathogen. *Phytopathology.* 2015;105: 966–981.  
484 doi:10.1094/PHYTO-01-15-0005-FI
- 485 12. Pajerowska-Mukhtar K, Stich B, Achenbach U, Ballvora A, Lübeck J, Strahwald J, et al. Single  
486 Nucleotide Polymorphisms in the Allene Oxide Synthase 2 Gene Are Associated With Field  
487 Resistance to Late Blight in Populations of Tetraploid Potato Cultivars. *Genetics.* 2009;181:  
488 1115–1127. doi:10.1534/genetics.108.094268
- 489 13. Gebhardt C, Valkonen JPT. Organization of Genes Controlling Disease Resistance in the Potato  
490 Genome. *Annual Review of Phytopathology.* 2001;39: 79–102.  
491 doi:10.1146/annurev.phyto.39.1.79
- 492 14. Haverkort AJ, Struik PC, Visser RGF, Jacobsen E. Applied Biotechnology to Combat Late  
493 Blight in Potato Caused by *Phytophthora Infestans*. *Potato Research.* 2009;52: 249–264.  
494 doi:10.1007/s11540-009-9136-3
- 495 15. Jansky SH, Spooner DM. The Evolution of Potato Breeding. *Plant Breeding Reviews.* Wiley-  
496 Blackwell; 2018. pp. 169–214. doi:10.1002/9781119414735.ch4
- 497 16. Torres L, Cuesta X, Monteros C, Rivadeneira J. Variedades. In: International Potato Center  
498 [Internet]. 2011 [cited 2 Mar 2014]. Available: [http://cipotato.org/region-](http://cipotato.org/region-quito/informacion/inventario-de-tecnologias/variedades/)  
499 [quito/informacion/inventario-de-tecnologias/variedades/](http://cipotato.org/region-quito/informacion/inventario-de-tecnologias/variedades/)
- 500 17. Barquero M, Gómez L, Brenes A. Resistencia al tizón tardío (*Phytophthora infestans*) en clones  
501 promisorios de papa en Costa Rica. *Agronomía Costarricense.* 2005;29: 31–45.



18. Álvarez MF, Angarita M, Delgado MC, García C, Jiménez-Gomez J, Gebhardt C, et al. Identification of Novel Associations of Candidate Genes with Resistance to Late Blight in *Solanum tuberosum* Group Phureja. *Front Plant Sci.* 2017;8: 1040. doi:10.3389/fpls.2017.01040
19. Gebhardt C, Ballvora A, Walkemeier B, Oberhagemann P, Schöler K. Assessing genetic potential in germplasm collections of crop plants by marker-trait association: a case study for potatoes with quantitative variation of resistance to late blight and maturity type. *Molecular Breeding.* 2004;13: 93–102. doi:10.1023/B:MOLB.0000012878.89855.df
20. Simko I. One potato, two potato: haplotype association mapping in autotetraploids. *Trends Plant Sci.* 2004;9: 441–448. doi:10.1016/j.tplants.2004.07.003
21. Visker MHPW, Keizer LCP, Van Eck HJ, Jacobsen E, Colon LT, Struik PC. Can the QTL for late blight resistance on potato chromosome 5 be attributed to foliage maturity type? *Theor Appl Genet.* 2003;106: 317–325. doi:10.1007/s00122-002-1021-2
22. Corwin JA, Kliebenstein DJ. Quantitative Resistance: More Than Just Perception of a Pathogen. *Plant Cell.* 2017;29: 655–665. doi:10.1105/tpc.16.00915
23. Danan S, Chauvin J-E, Caromel B, Moal J-D, Pellé R, Lefebvre V. Major-effect QTLs for stem and foliage resistance to late blight in the wild potato relatives *Solanum sparsipilum* and *S. spegazzinii* are mapped to chromosome X. *Theor Appl Genet.* 2009;119: 705–719. doi:10.1007/s00122-009-1081-7
24. Gao L, Bradeen JM. Contrasting Potato Foliage and Tuber Defense Mechanisms against the Late Blight Pathogen *Phytophthora infestans*. Wong S-M, editor. *PLOS ONE.* 2016;11: e0159969. doi:10.1371/journal.pone.0159969
25. Gao L, Tu Z, Millett BP, Bradeen JM. Insights into organ-specific pathogen defense responses in plants: RNA-seq analysis of potato tuber-*Phytophthora infestans* interactions. *BMC Genomics.* 2013;14: 340. doi:10.1186/1471-2164-14-340
26. Alarcón J, Torrado E, Nuñez P, Forigua V. Manejo fitosanitario del cultivo de la papa (*Solanum tuberosum* subsp. *andigena* y *S. phureja*). *Medidas para la temporada invernal.* Produmedios; 2011.
27. Sonah H, Bastien M, Iquira E, Tardivel A, Légaré G, Boyle B, et al. An Improved Genotyping by Sequencing (GBS) Approach Offering Increased Versatility and Efficiency of SNP Discovery and Genotyping. *PLoS ONE.* 2013;8: e54603. doi:10.1371/journal.pone.0054603
28. Duitama J, Quintero JC, Cruz DF, Quintero C, Hubmann G, Foulquié-Moreno MR, et al. An integrated framework for discovery and genotyping of genomic variants from high-throughput sequencing experiments. *Nucleic Acids Res.* 2014;42: e44. doi:10.1093/nar/gkt1381
29. Potato Genome Sequencing Consortium, Xu X, Pan S, Cheng S, Zhang B, Mu D, et al. Genome sequence and analysis of the tuber crop potato. *Nature.* 2011;475: 189–195. doi:10.1038/nature10158
30. Ñustez C. Variedades colombianas de papa. Grupo imágenes; 2011.

31. Vargas AM, Ocampo LMQ, Céspedes MC, Carreño N, González A, Rojas A, et al. Characterization of *Phytophthora infestans* Populations in Colombia: First Report of the A2 Mating Type. *Phytopathology*. 2008;99: 82–88. doi:10.1094/PHYTO-99-1-0082
32. Nita M, Ellis MA, Madden LV. Reliability and accuracy of visual estimation of *Phomopsis* leaf blight of strawberry. *Phytopathology*. 2003; 93.8: 995-1005. doi:10.1094/PHYTO.2003.93.8.995.
33. Forbes G, Perez W, Andrade-Piedra J. Field assessment of resistance in potato to *Phytophthora infestans*: International cooperators guide. 2014. doi:10.4160/9789290604402
34. Bock CH, Poole GH, Parker PE, Gottwald TR. Plant Disease Severity Estimated Visually, by Digital Photography and Image Analysis, and by Hyperspectral Imaging. *Critical Reviews in Plant Sciences*. 2010;29: 59–107. doi:10.1080/07352681003617285
35. Campbell CL, Madden LV. *Introduction to Plant Disease Epidemiology*. 1 edition. New York: Wiley-Interscience; 1990.
36. Pacheco Á, Vargas M, Alvarado G, Rodríguez F, Crossa J, Burgueño J. GEA-R (Genotype x Environment Analysis with R for Windows) Version 4.1 [Internet]. 2018. Available: <https://data.cimmyt.org/dataset.xhtml?persistentId=hdl:11529/10203>
37. Benjamini Y, Yekutieli D. False Discovery Rate–Adjusted Multiple Confidence Intervals for Selected Parameters. *Journal of the American Statistical Association*. 2005;100: 71–81. doi:10.1198/016214504000001907
38. Pritchard JK, Stephens M, Donnelly P. Inference of population structure using multilocus genotype data. *Genetics*. 2000;155: 945–959.
39. Danan S, Veyrieras J-B, Lefebvre V. Construction of a potato consensus map and QTL meta-analysis offer new insights into the genetic architecture of late blight resistance and plant maturity traits. *BMC Plant Biology*. 2011;11: 16. doi:10.1186/1471-2229-11-16
40. Elshire RJ, Glaubitz JC, Sun Q, Poland JA, Kawamoto K, Buckler ES, et al. A Robust, Simple Genotyping-by-Sequencing (GBS) Approach for High Diversity Species. *PLoS ONE*. 2011;6: e19379. doi:10.1371/journal.pone.0019379
41. Wang S, Meyer E, McKay JK, Matz MV. 2b-RAD: a simple and flexible method for genome-wide genotyping. *Nat Methods*. 2012;9: 808–810. doi:10.1038/nmeth.2023
42. Voorrips RE. MapChart: Software for the Graphical Presentation of Linkage Maps and QTLs. *J Hered*. 2002;93: 77–78. doi:10.1093/jhered/93.1.77
43. Jaramillo S. Monografía sobre *Phytophthora infestans* (Mont) de Bary. Facultad de Ciencias Agropecuarias. Universidad Nacional de Colombia. 2003.
44. Fry B, Myers K, Mayton H, Small I, Danies G. LATE BLIGHT UPDATE 2015. : 4.
45. Collard BCY, Jahufer MZZ, Brouwer JB, Pang ECK. An introduction to markers, quantitative trait loci (QTL) mapping and marker-assisted selection for crop improvement: The basic concepts. *Euphytica*. 2005;142: 169–196. doi:10.1007/s10681-005-1681-5

- 575 46. Balmer D, de Papajewski DV, Planchamp C, Glauser G, Mauch-Mani B. Induced resistance in  
576 maize is based on organ-specific defence responses. *The Plant Journal*. 2013;74: 213–225.  
577 doi:10.1111/tpj.12114
- 578 47. Golkari S, Gilbert J, Prashar S, Procunier JD. Microarray analysis of *Fusarium graminearum*-  
579 induced wheat genes: identification of organ-specific and differentially expressed genes. *Plant*  
580 *Biotechnology Journal*. 2007;5: 38–49. doi:10.1111/j.1467-7652.2006.00213.x
- 581 48. Costanzo S, Simko I, Christ BJ, Haynes KG. QTL analysis of late blight resistance in a diploid  
582 potato family of *Solanum phureja* × *S. stenotomum*. *Theor Appl Genet*. 2005;111: 609–617.  
583 doi:10.1007/s00122-005-2053-1
- 584 49. Simko I, Costanzo S, Ramanjulu V, Christ BJ, Haynes KG. Mapping polygenes for tuber  
585 resistance to late blight in a diploid *Solanum phureja* × *S. stenotomum* hybrid population. *Plant*  
586 *Breeding*. 2006;125: 385–389. doi:10.1111/j.1439-0523.2006.01232.x
- 587 50. Asaro A, Ziegler G, Ziyomo C, Hoekenga OA, Dilkes BP, Baxter I. The Interaction of  
588 Genotype and Environment Determines Variation in the Maize Kernel Ionome. *G3 (Bethesda)*.  
589 2016;6: 4175–4183. doi:10.1534/g3.116.034827
- 590 51. Tétard-Jones C, Kertesz MA, Preziosi RF. Quantitative trait loci mapping of phenotypic  
591 plasticity and genotype-environment interactions in plant and insect performance. *Philos Trans*  
592 *R Soc Lond, B, Biol Sci*. 2011;366: 1368–1379. doi:10.1098/rstb.2010.0356
- 593 52. Dechaine JM, Brock MT, Iniguez-Luy FL, Weinig C. Quantitative trait loci × environment  
594 interactions for plant morphology vary over ontogeny in *Brassica rapa*. *New Phytol*. 2014;201:  
595 657–669. doi:10.1111/nph.12520
- 596 53. Ghislain M, Trognitz B, Herrera M del R, Solis J, Casallo G, Vásquez C, et al. Genetic loci  
597 associated with field resistance to late blight in offspring of *Solanum phureja* and *S. tuberosum*  
598 grown under short-day conditions. *Theor Appl Genet*. 2001;103: 433–442. doi:10.1007/s00122-  
599 001-0545-1
- 600 54. Huard-Chauveau C, Percepied L, Debieu M, Rivas S, Kroj T, Kars I, et al. An atypical kinase  
601 under balancing selection confers broad-spectrum disease resistance in *Arabidopsis*. *PLoS*  
602 *Genet*. 2013;9: e1003766. doi:10.1371/journal.pgen.1003766
- 603 55. Kohorn BD. Cell wall-associated kinases and pectin perception. *J Exp Bot*. 2016;67: 489–494.  
604 doi:10.1093/jxb/erv467
- 605 56. Roux F, Noël L, Rivas S, Roby D. ZRK atypical kinases: emerging signaling components of  
606 plant immunity. *New Phytologist*. 2014;203: 713–716. doi:10.1111/nph.12841
- 607 57. Vásquez AX, Soto Sedano JC, López Carrascal CE, Vásquez AX, Soto Sedano JC, López  
608 Carrascal CE. Unraveling the molecules hidden in the gray shadows of quantitative disease  
609 resistance to pathogens. *Acta Biológica Colombiana*. 2018;23: 5–16.  
610 doi:10.15446/abc.v23n1.66487
- 611 58. Tena G, Boudsocq M, Sheen J. Protein kinase signaling networks in plant innate immunity.  
612 *Curr Opin Plant Biol*. 2011;14: 519–529. doi:10.1016/j.pbi.2011.05.006

59. Fantino E, Segretin ME, Santin F, Mirkin FG, Ulloa RM. Analysis of the potato calcium-dependent protein kinase family and characterization of StCDPK7, a member induced upon infection with *Phytophthora infestans*. *Plant Cell Rep.* 2017;36: 1137–1157. doi:10.1007/s00299-017-2144-x
60. Bradeen JM, Iorizzo M, Molloy DS, Raasch J, Kramer LC, Millett BP, et al. Higher Copy Numbers of the Potato RB Transgene Correspond to Enhanced Transcript and Late Blight Resistance Levels. *MPMI.* 2009;22: 437–446. doi:10.1094/MPMI-22-4-0437

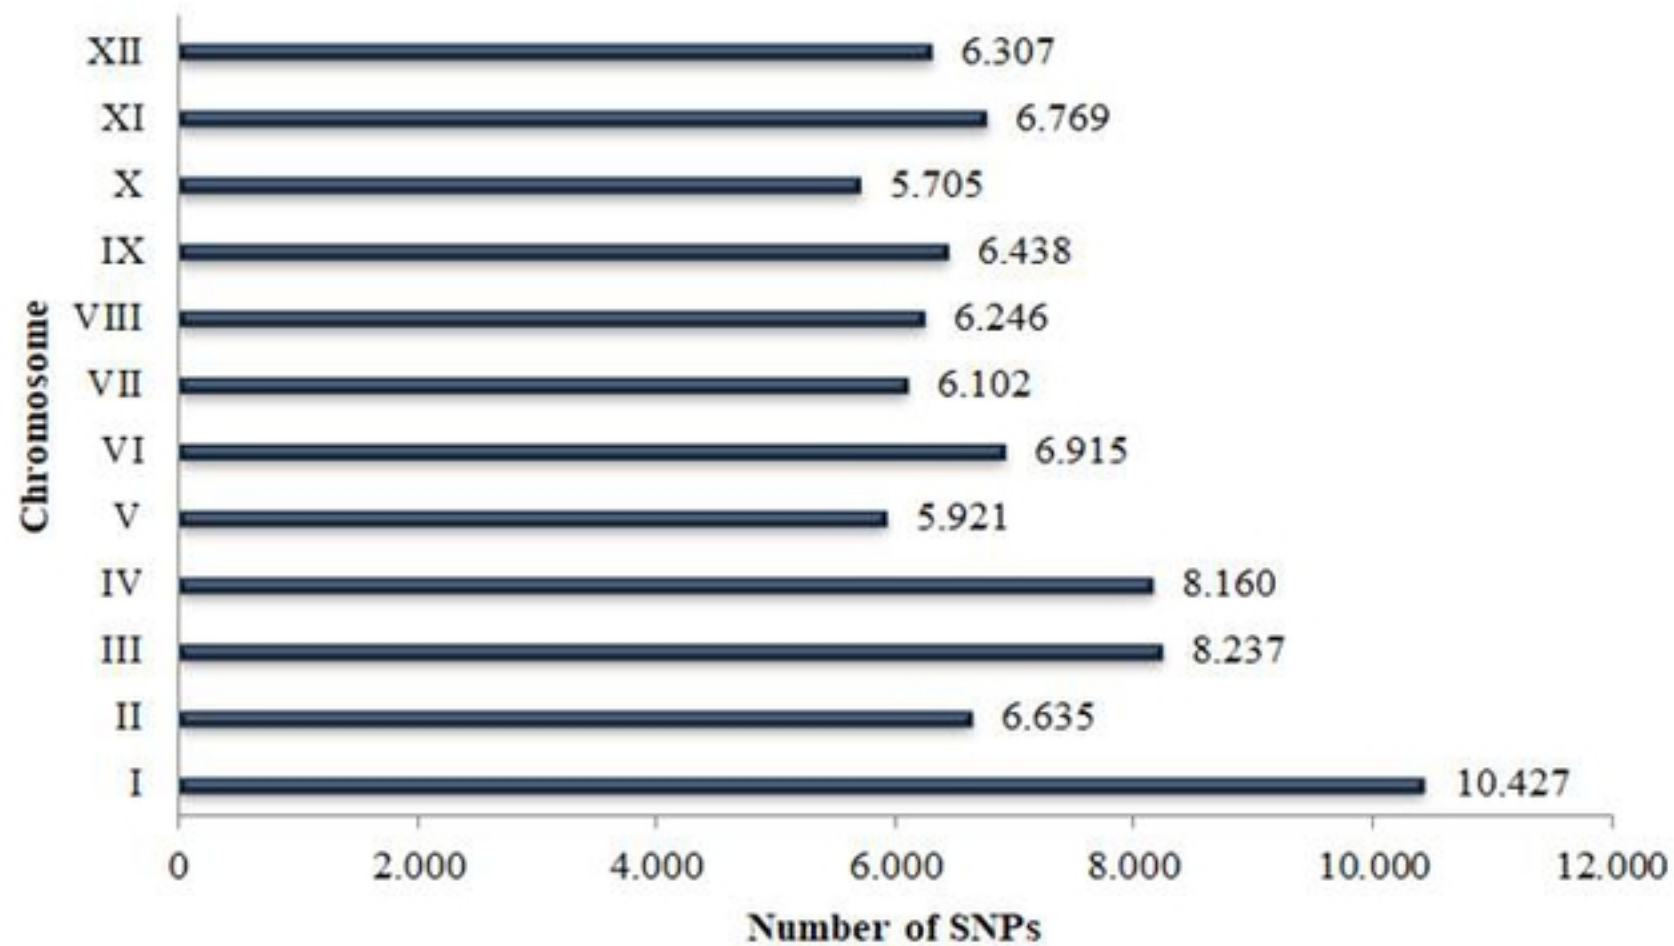

**Figure 1.** Number of SNPs mapped for each chromosome in the potato genome. Numbers on the right of bars show the total SNPs identified through GBS and 2b-RAD located in each chromosome as indicated by roman letters on y-axis.

Figure 1



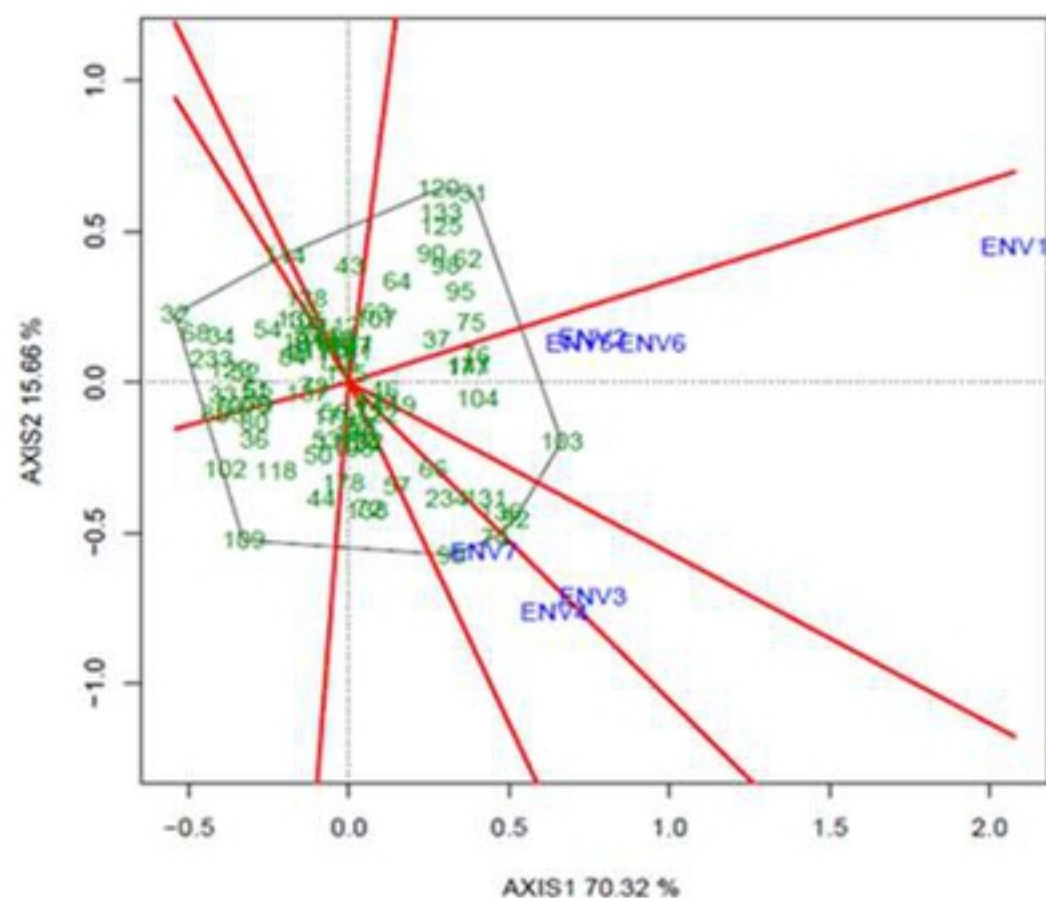

a

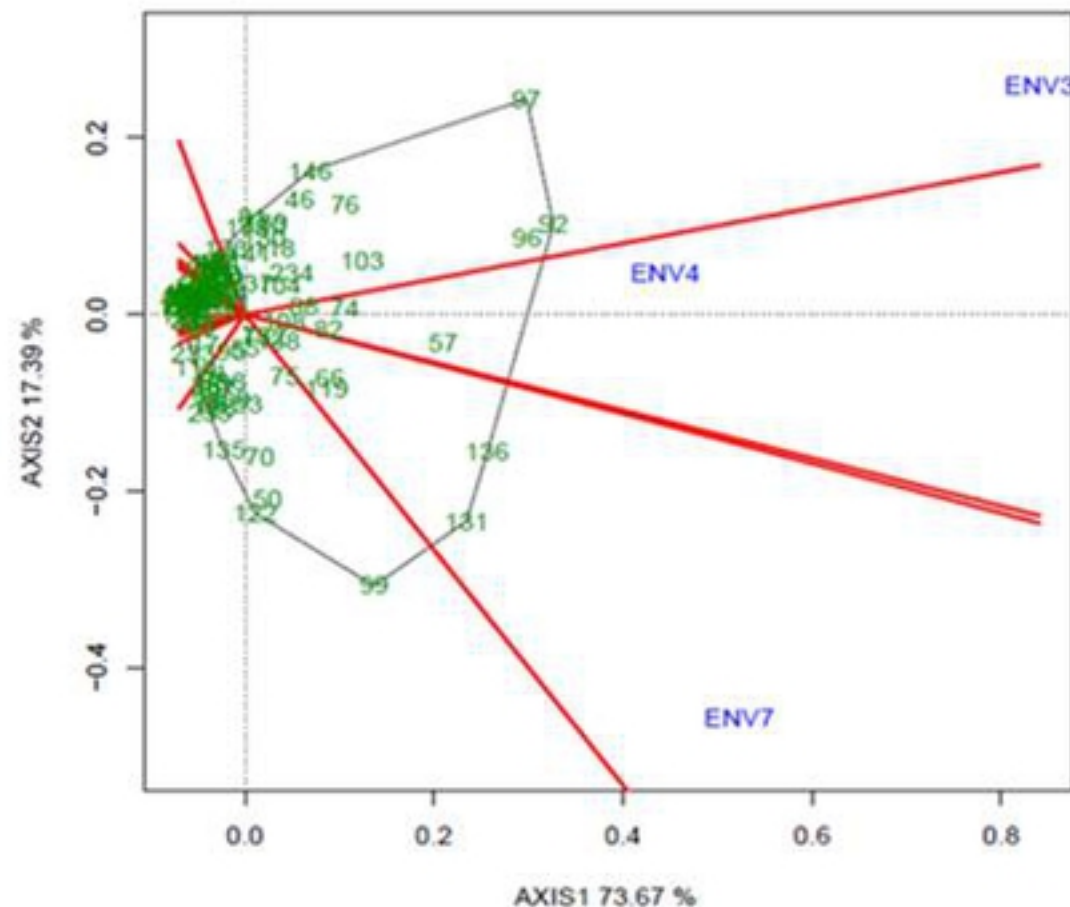

b

**Figure 2. Which Won Where/What graphic of GGE-Biplot analysis for foliage and stem resistance evaluation. (a) GGE-Biplot analysis for phenotype evaluation against *P. infestans* in foliage. (b) GGE-Biplot analysis for phenotype evaluation against *P. infestans* in stem. ENV codes are shown in table 1.**

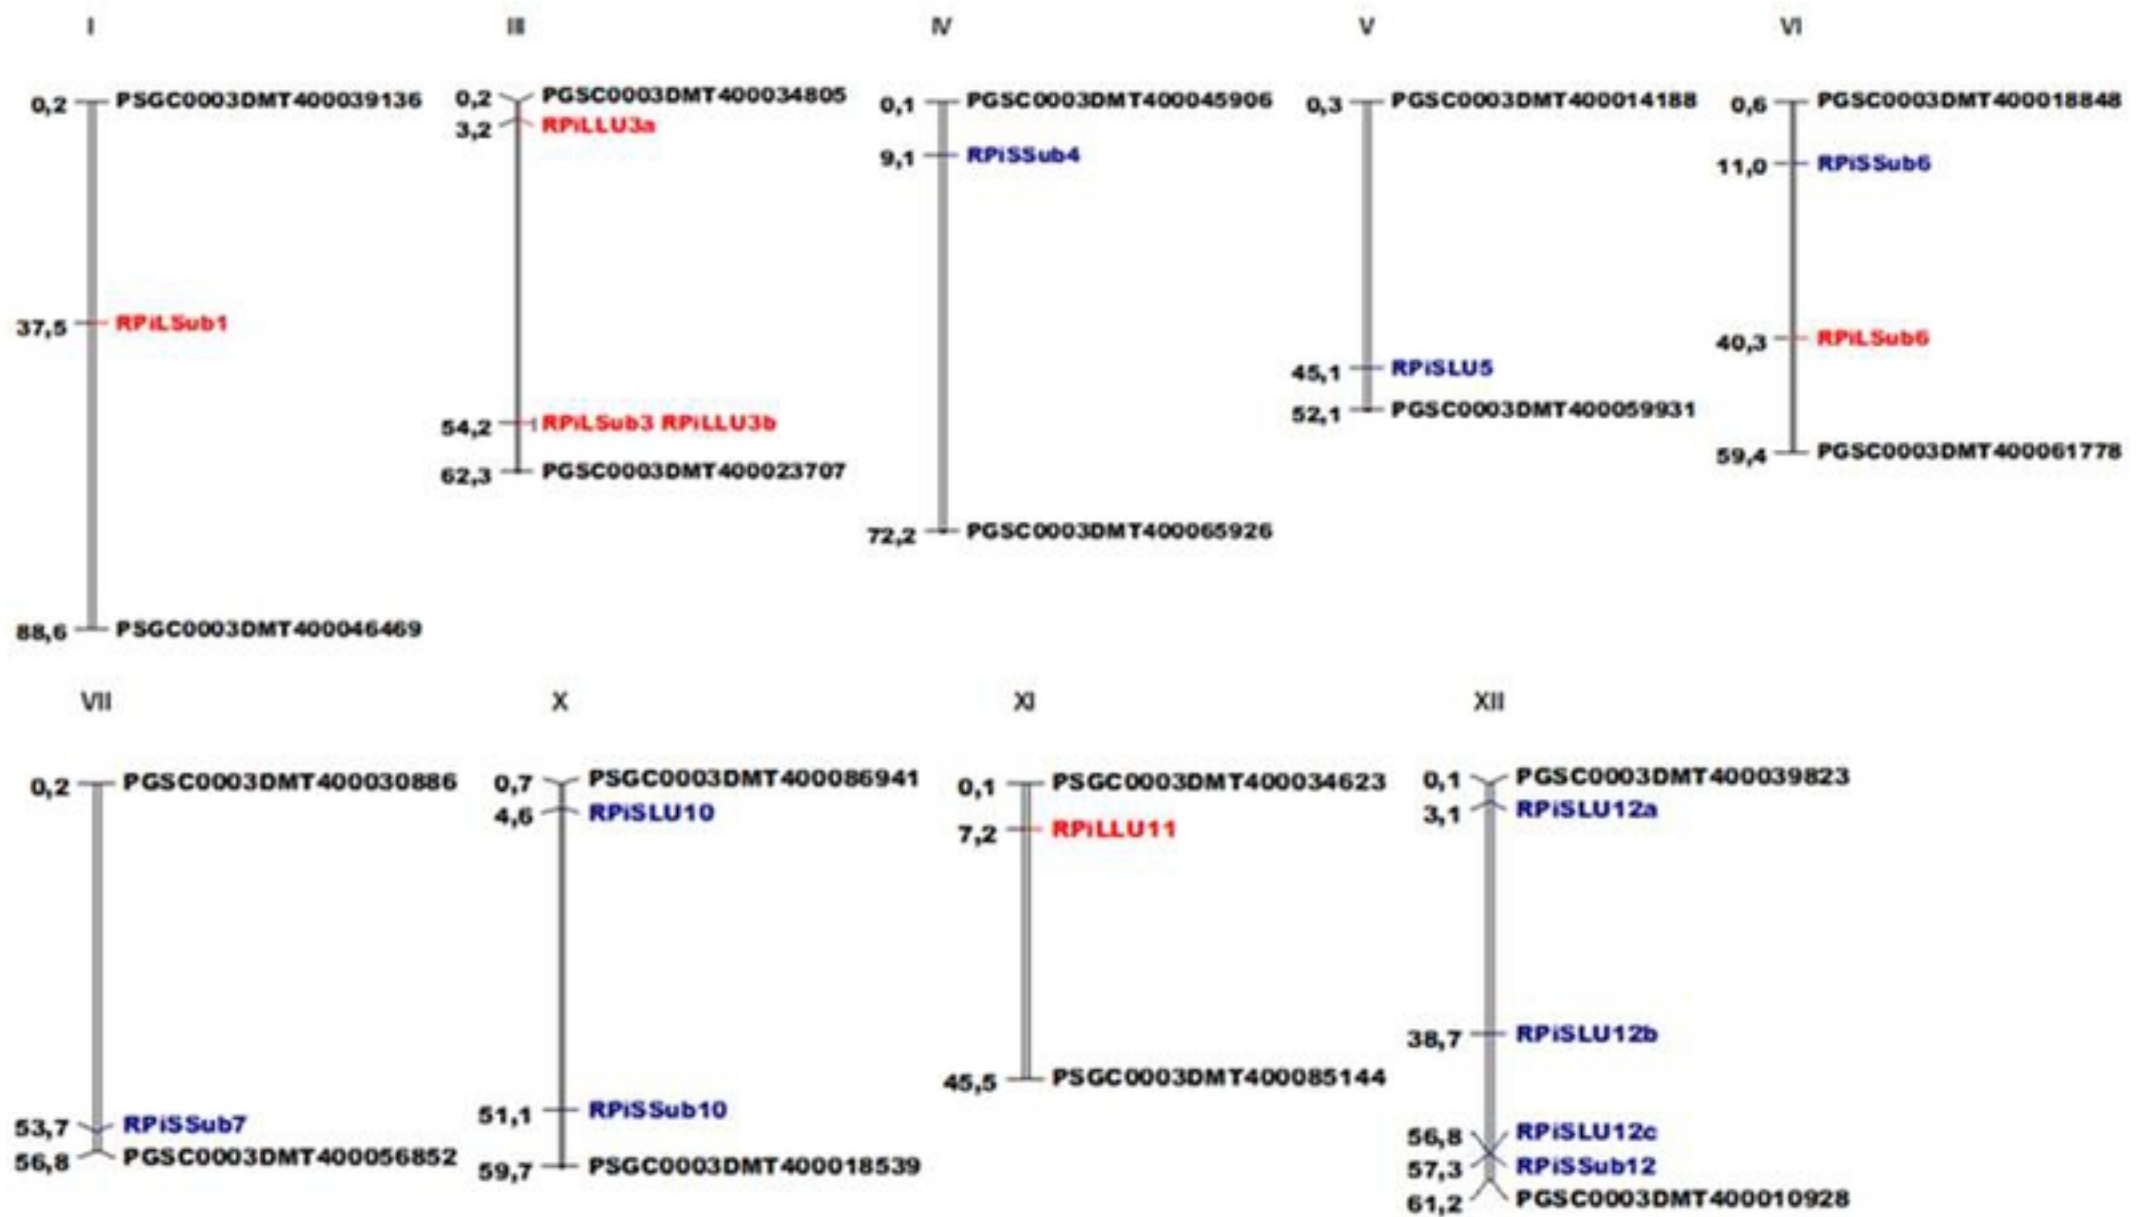

**Figure 3.** SNPs mapped in the potato chromosomes of Group Phureja. Genomic distances are given in Mbp according to the PGSC V4.03 pseudomolecules (Xu et al., 2011). In red are presented the QTL for late blight resistance detected in the phenotypic response for foliage, while in blue are presented those detected for stems. In black are presented the markers that limit each chromosome in the potato genome. Diagram plotted using MapChart software (Voorrips, 2002).
